# Supplementary material for: Small RNA and PARE sequencing in flower bud reveal the involvement of sRNAs in endodormancy release of Japanese pear (Pyrus pyrifolia 'Kosui')
Source: PubMed Central journal article supplement (PMC4791883; doi:10.1186/s12864-016-2514-8), 2016-03-15
Supplement: 12864_2016_2514_MOESM4_ESM.pdf [file 12864_2016_2514_MOESM4_ESM.pdf]

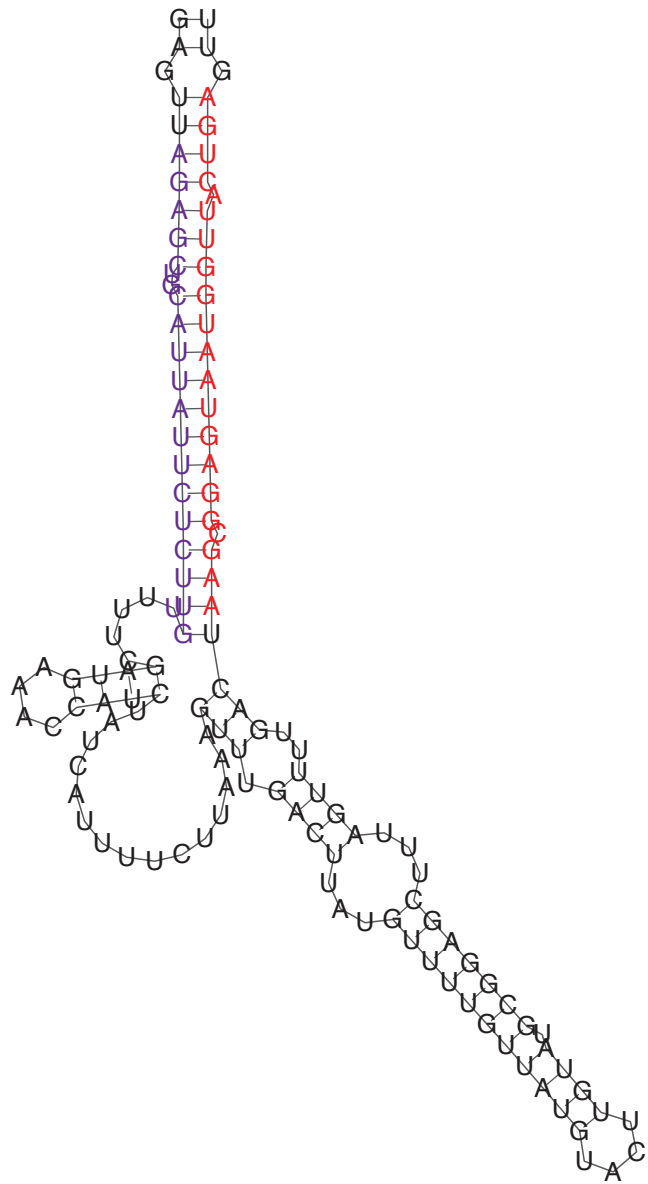

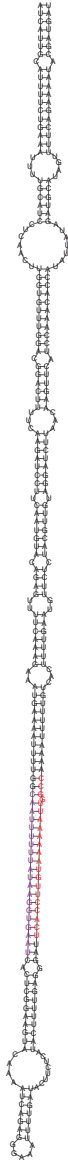

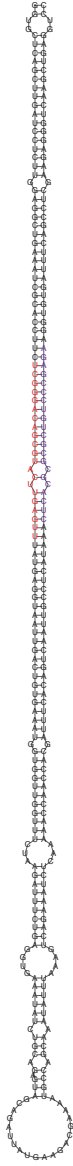

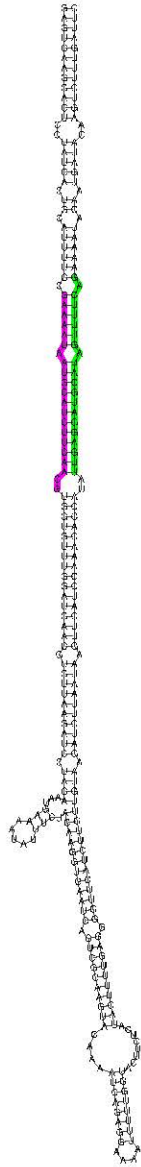

TTGAGGATGCATAGTTTTTCAG\_scaffold266.0\_383741-383761



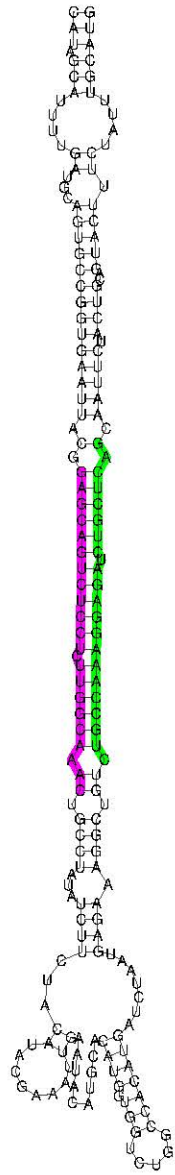

CTGCCAAAGGAGATCTGCTCAG\_scaffold1.0\_3618550-3618571



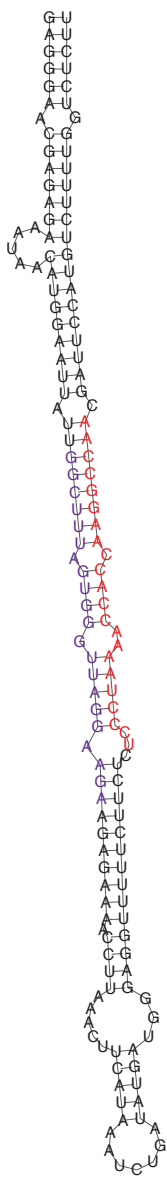





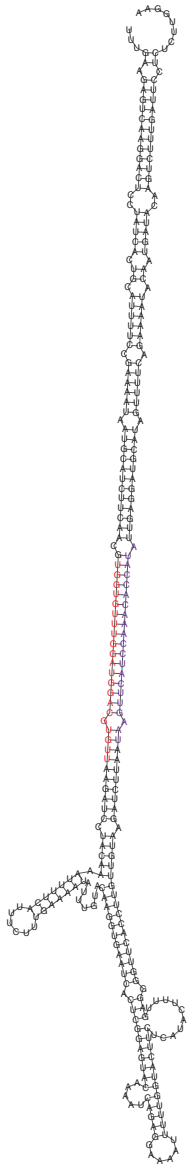

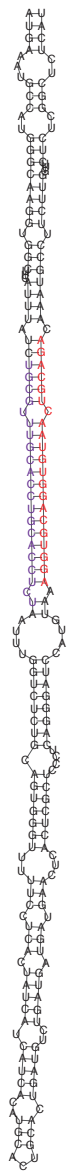

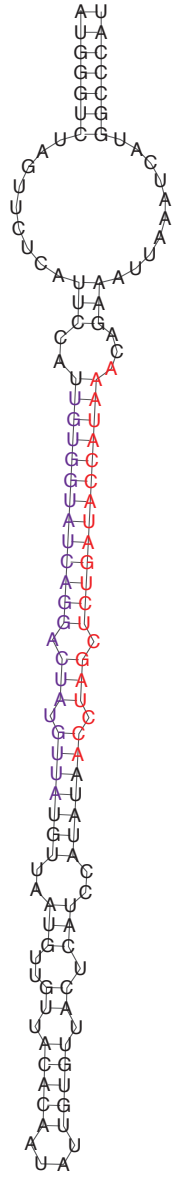



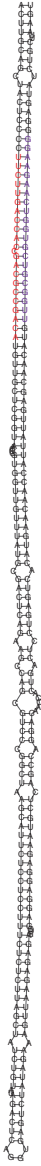



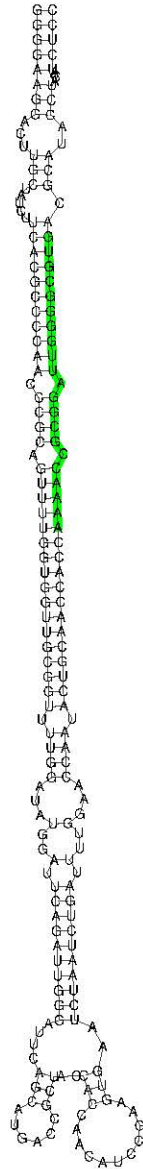

AAAACCGCGGATTGGGGCGTG\_scaffold17.0\_1106089-1106109

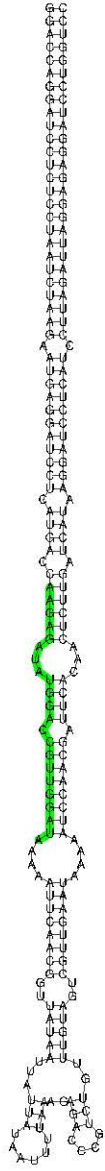

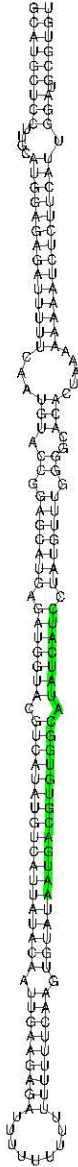



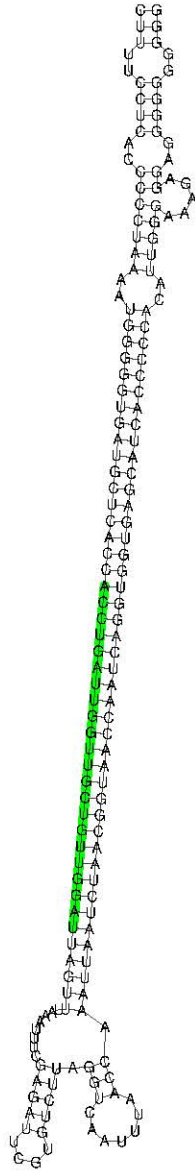

ACCTGATTGGTTGCTGTTGGAT\_scaffold89.0\_380874-380895

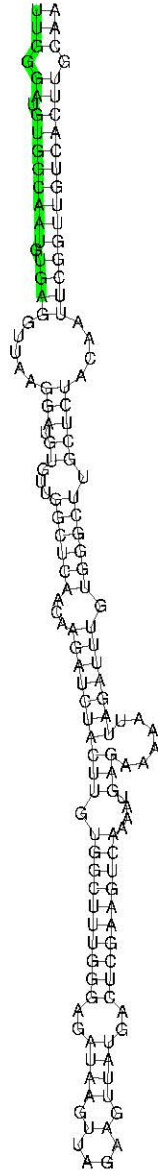

ACTTTGGGATGTGGCAATGTGA\_scaffold285.0\_183708-183729

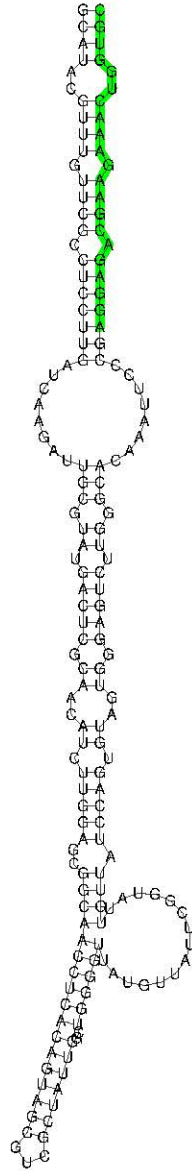

AGGAGACGAAGAACTGGTGC\_scaffold463.0\_226452-226472

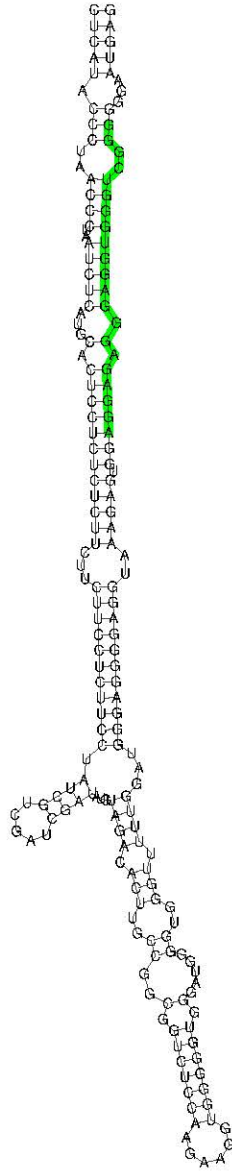

AGGAGAGGGAGGTGGGTCGGG\_scaffold411.0\_139391-139411



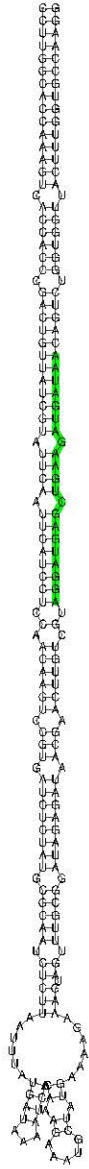

A-U  
U-A  
G-C  
A-U  
A-U  
A-U  
U-U  
U-U  
A-U  
G-C  
G-C  
A-U  
G-C  
A-U  
A-U  
U-A  
G-C  
U-A  
G-C  
U-A  
G-C  
A-U  
U-A  
G-C  
G-C  
U-U  
G-C  
G-C  
A-U  
G-C  
G-C  
A-U  
U-A  
U-A  
G-C  
A-U  
A-U  
U-A  
G-C  
A-U  
A-U  
A-U  
U-A  
A-U  
A-U  
U-A  
A-U  
U-A  
G-C  
G-C  
G-C  
G-C  
G-C  
G-C  
A-U  
A-U  
U-A  
U-A  
U-A  
A-U  
A-U  
G-C  
G-C  
G-C  
G-C  
G-C  
A-U  
A-U  
U-A  
G-C  
A-U  
U-A  
A-U  
A-U  
A-U  
A-U  
A-U  
A-U  
U-A  
U-A  
U-U  
U-U  
U-U

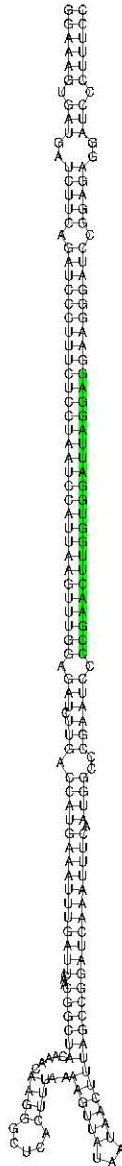

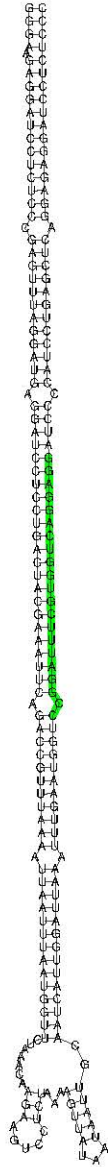



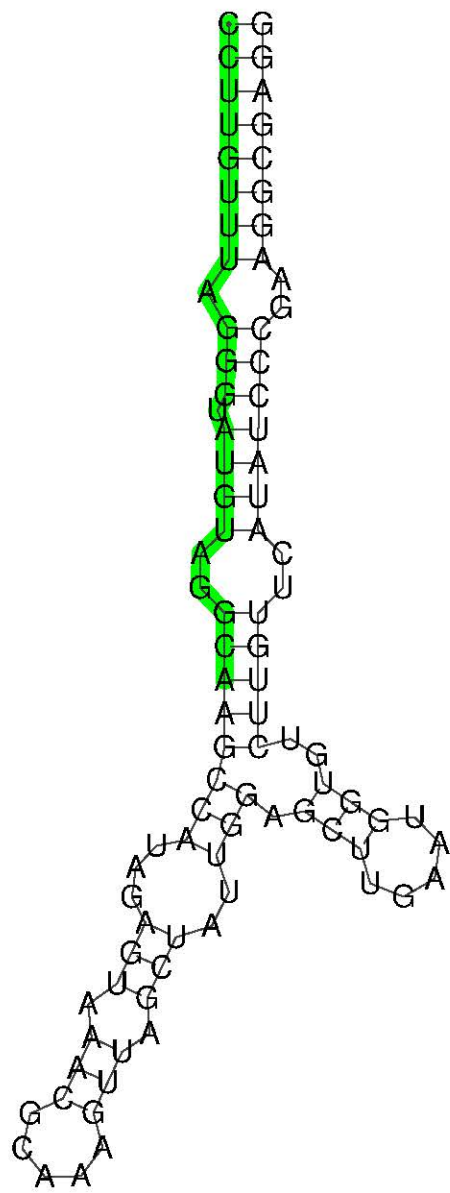

CCTTGTTAGGGTATGTAGGCA\_scaffold1113.0\_55073-55094

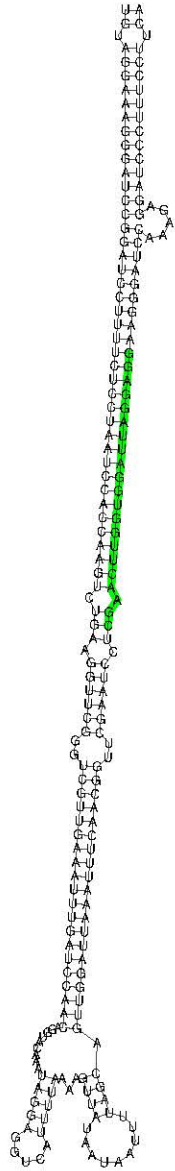

CGAACTTGGTGGATTAGGAGG\_scaffold39.0\_1241288-1241308

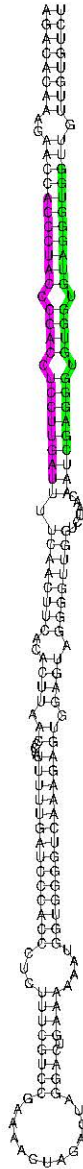

CGAGGGTGTGGTGTAGGGTGG\_scaffold622.0\_272702-272722



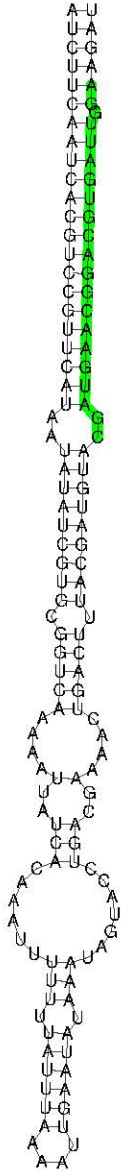

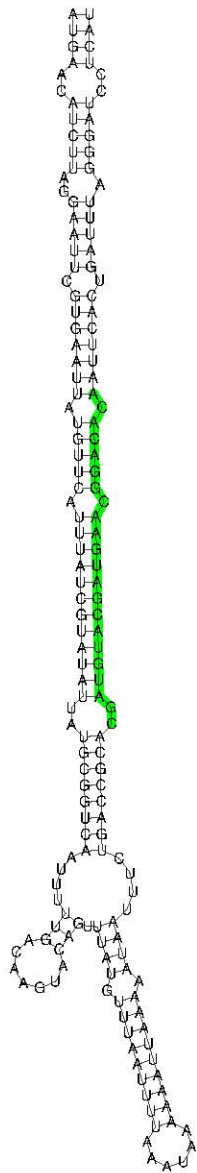

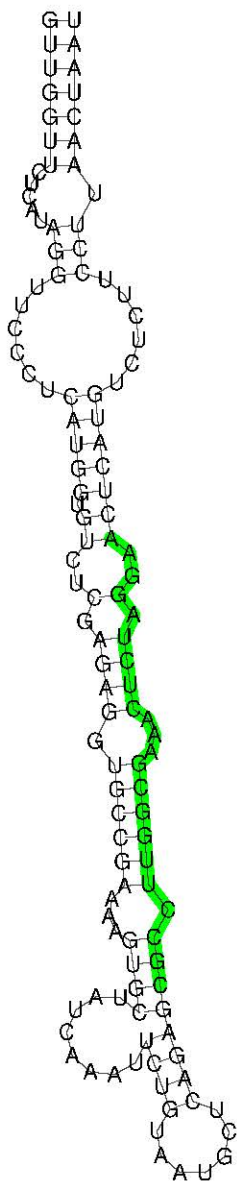

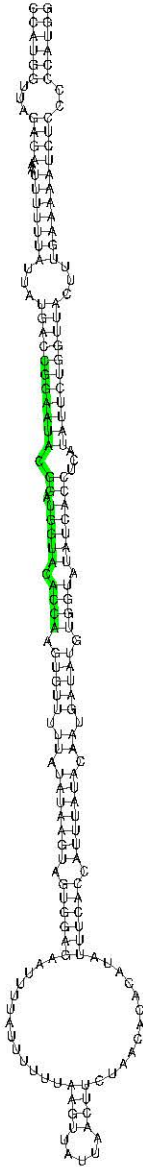





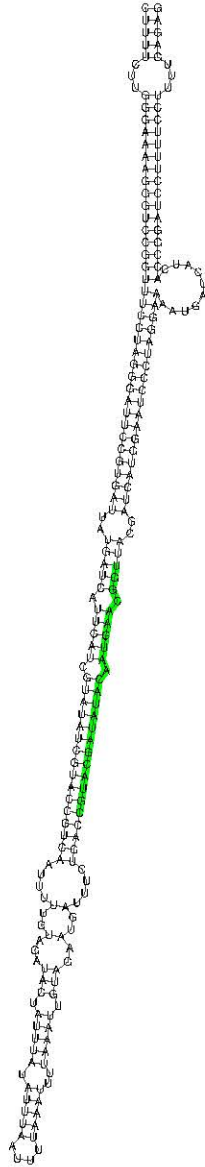

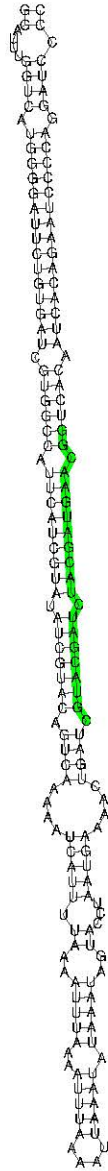



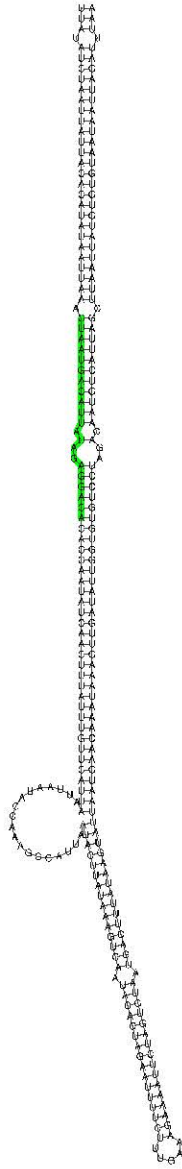

CTAATGACATTATAGAGGACA\_scaffold103.0\_807727-807747

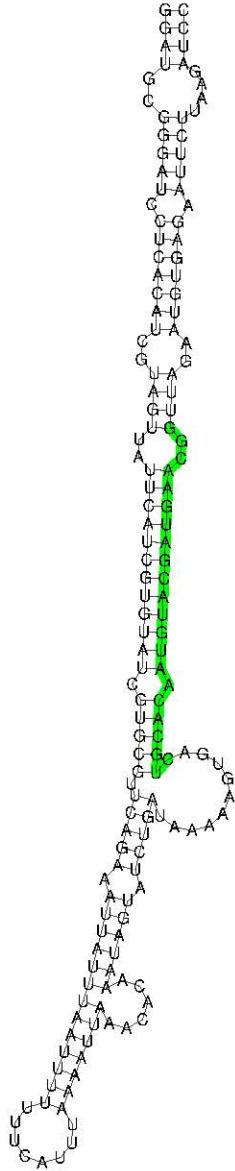

CTGCACAATGTACGATGAACGG\_scaffold13.0\_1394637-1394658



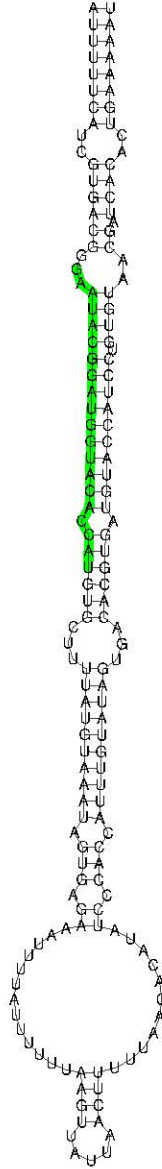

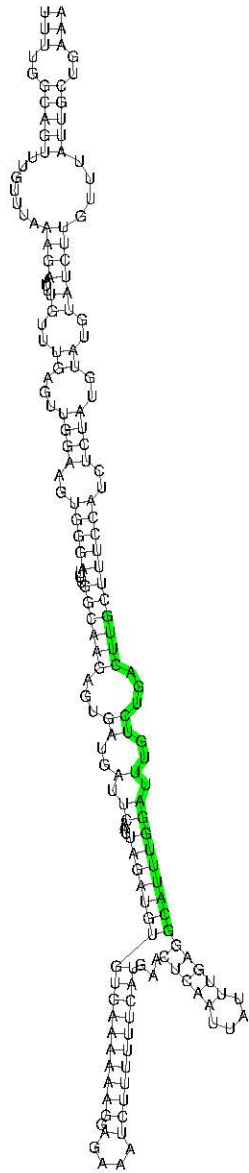

GCATTTGGATTTGTCTGACTTG\_scaffold1206.0\_10164-10185

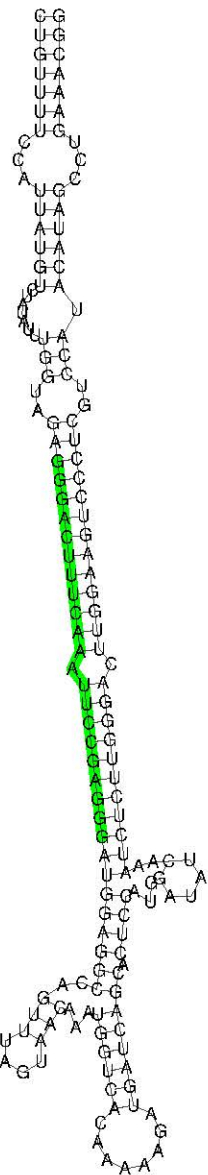

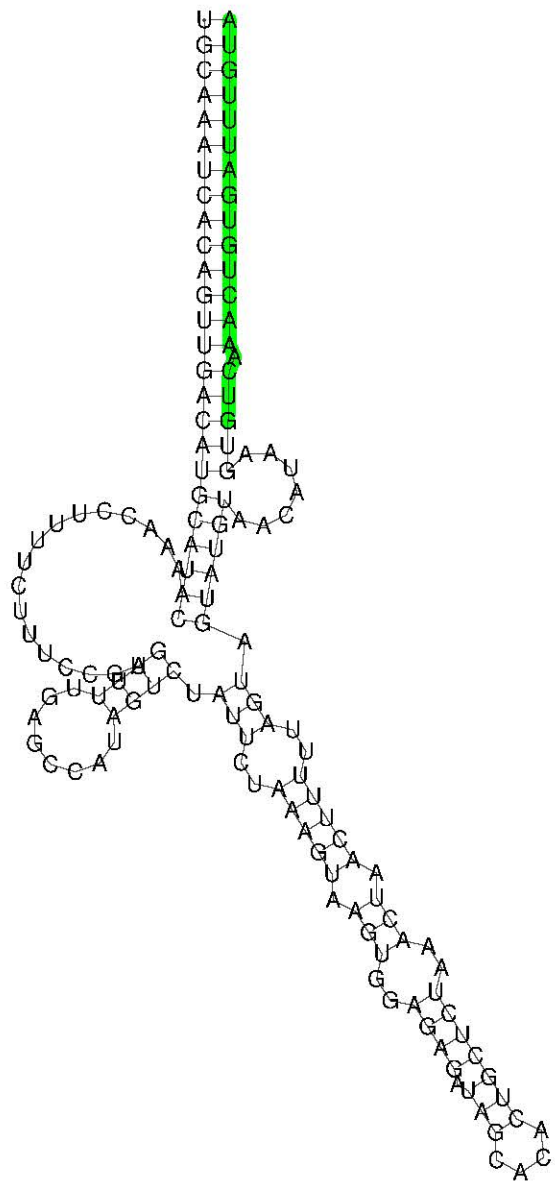

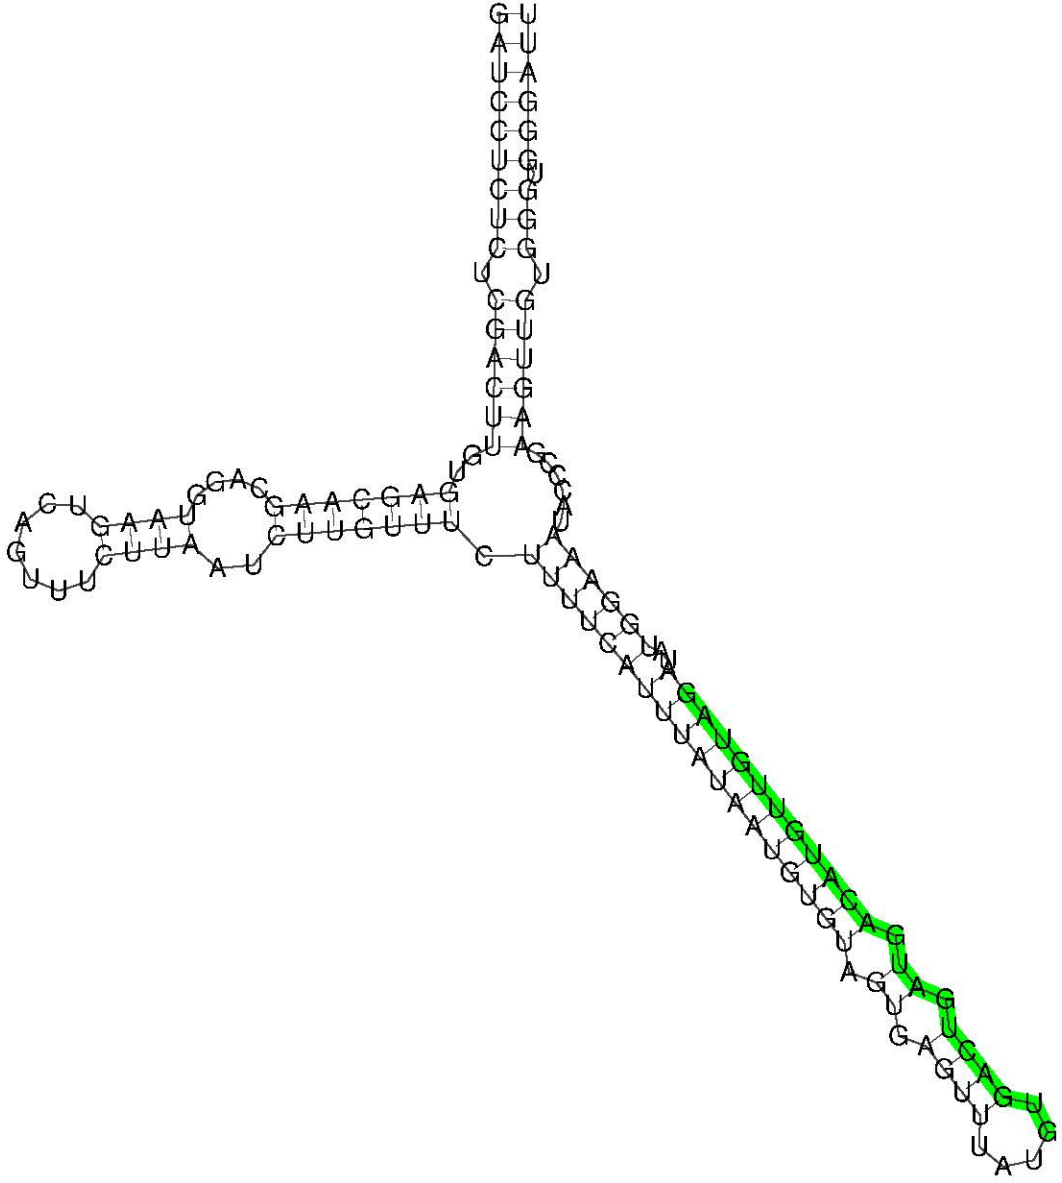



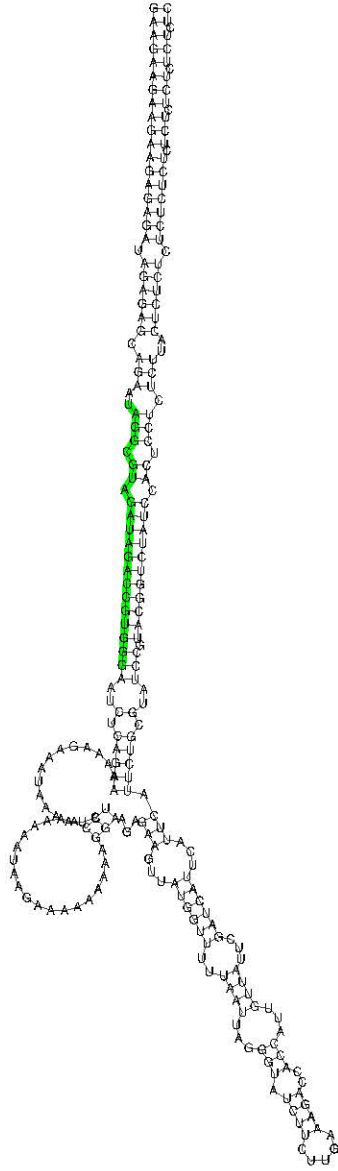

TAGGCGTAGATAGACCGTGGG\_scaffold144.0\_39353-39373

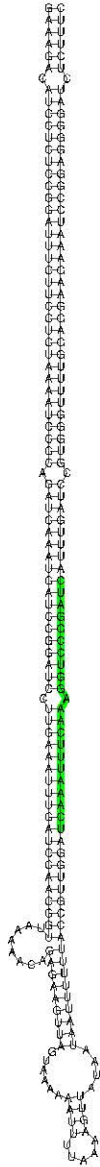

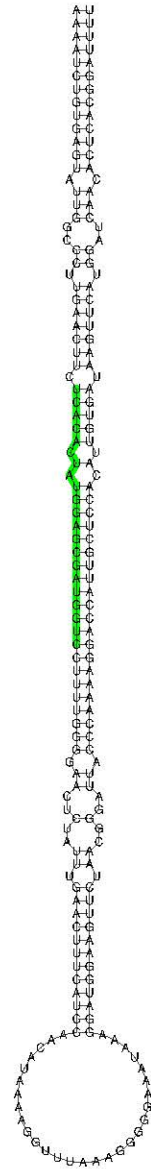

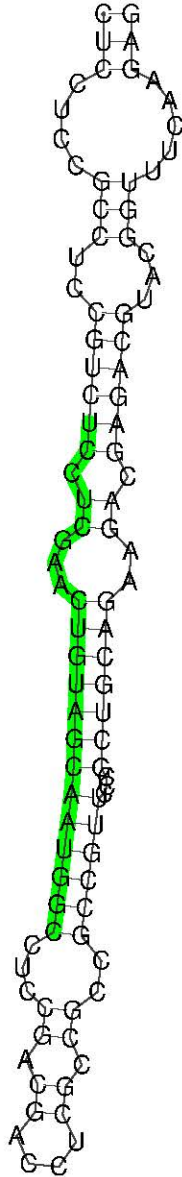

TCCTCGAACTGTAGCAATGGC\_scaffold44.1\_36177-36197



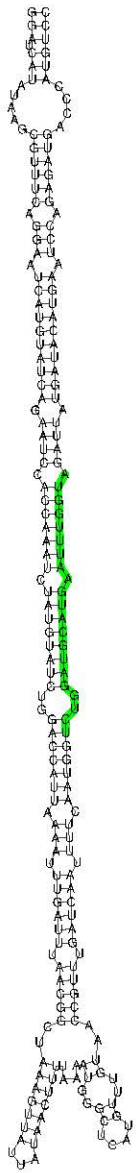

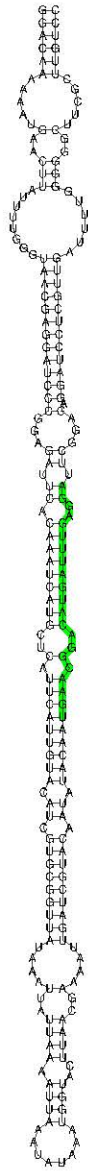

TGAACGGACATGATTTGAGGA\_scaffold3.0\_371612-371632





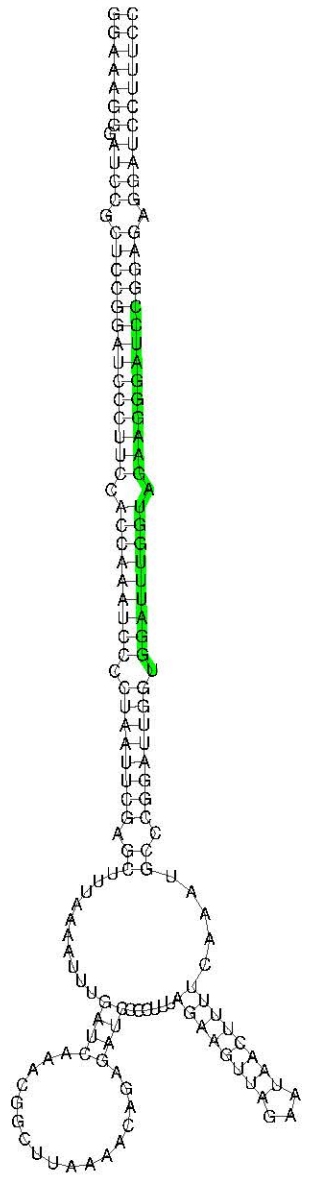

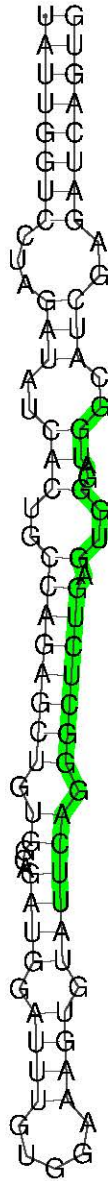

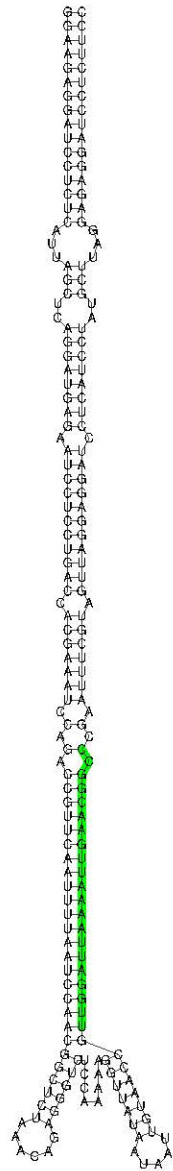

TTGGATTAAAATTGAACGGCC\_scaffold1.0\_124875-124895
